# Supplementary material for: Antimalarial Activity of Nigella sativa L. Seed Extracts and Selection of Resistance in Plasmodium berghei ANKA in a Mouse Model
Source: Hindawi journal article supplement (doi:10.1155/2021/6165950), 2021-02-03
Supplement: f1 [file 6165950.f1.pdf]

## Photomicrographs of *in vivo* and molecular experiments

\*Donor mice and subsequent parasitemia Giemsa stained photomicrograph

Mouse shivering out of malaria

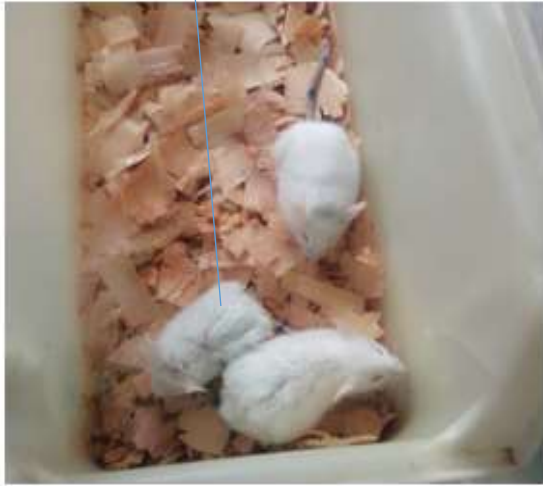

Red blood cell infected with *P. berghei* ANKA

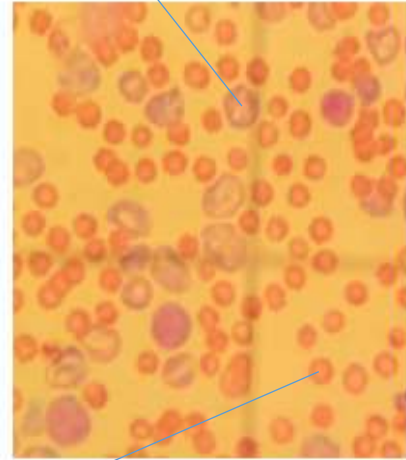

Normal red blood cell

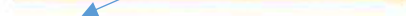

\* Parasite growth on day 1 in animals treated with Ethyl acetate extract

Normal red blood cell

Red blood cell infected with *P. berghei*  
ANKA

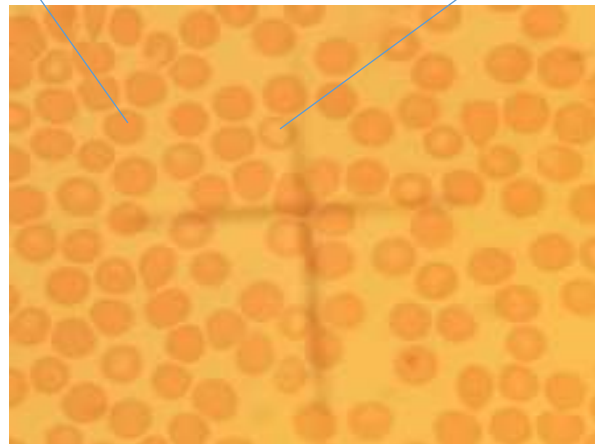

\* Parasite growth on day 1 in animals treated with Methanol extract

Normal red blood cell

Red blood cell infected with *P. berghei*  
ANKA

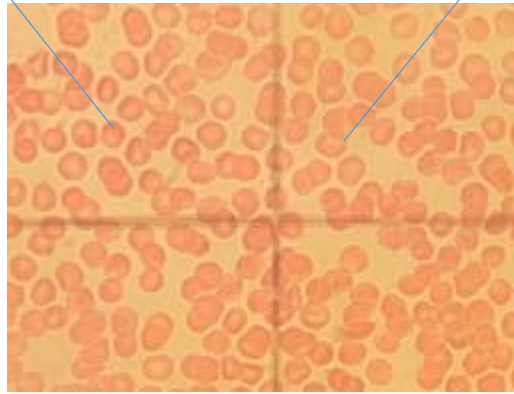

\* Parasite clearance by Ethyl acetate extract

Normal red blood cell

Red blood cell infected with *P. berghei*  
ANKA

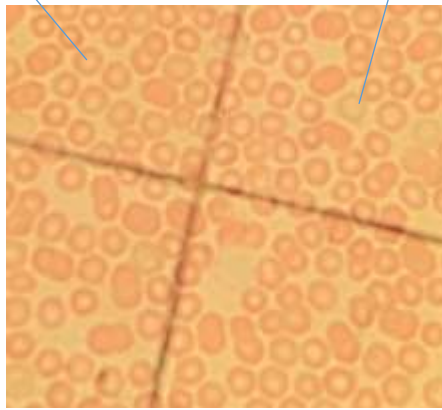

\* Parasite clearance by Methanol extract

Normal red blood cell

Red blood cell infected with *P. berghei*  
ANKA

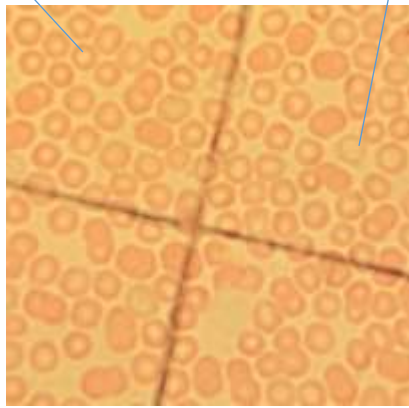

\* Parasite clearance by Chloroquine

Normal red blood cell

Red blood cell infected with *P. berghei*  
ANKA

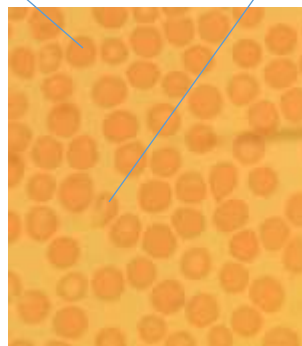

**Amplification products with *Plasmodium berghei* ANKA**

\* PbMDR1 gel picture; 4002 bp

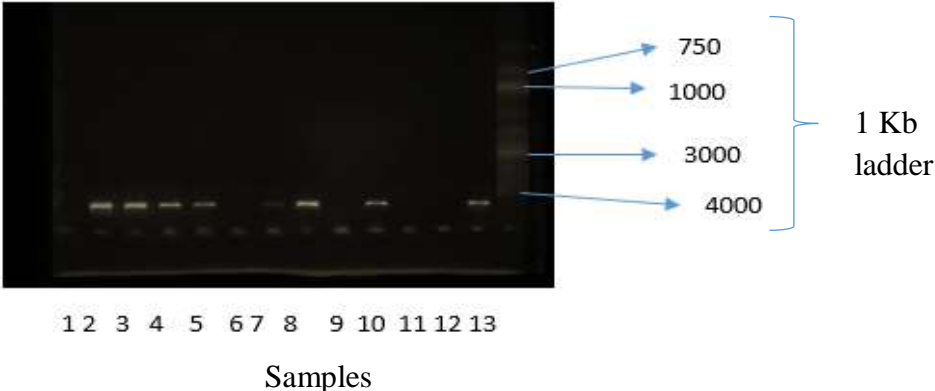

\* PbCRT gel picture; 3077 bp

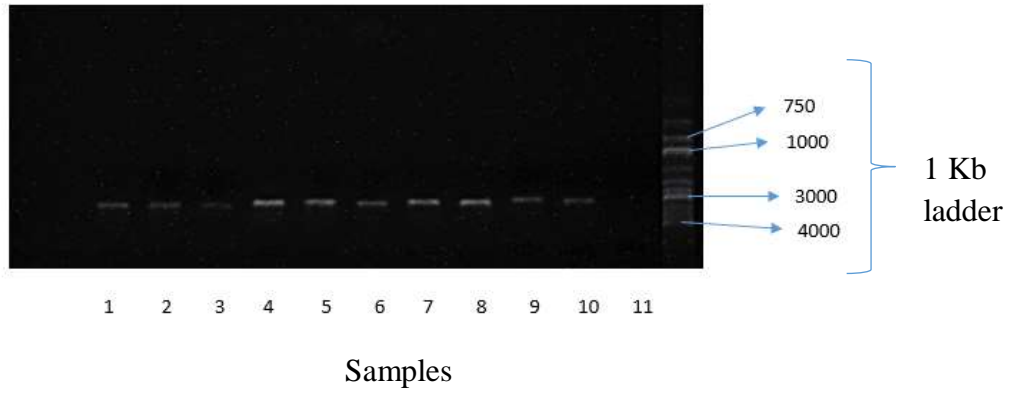



\* Demonstration of liver infected with *P.berghei* ANKA versus normal liver

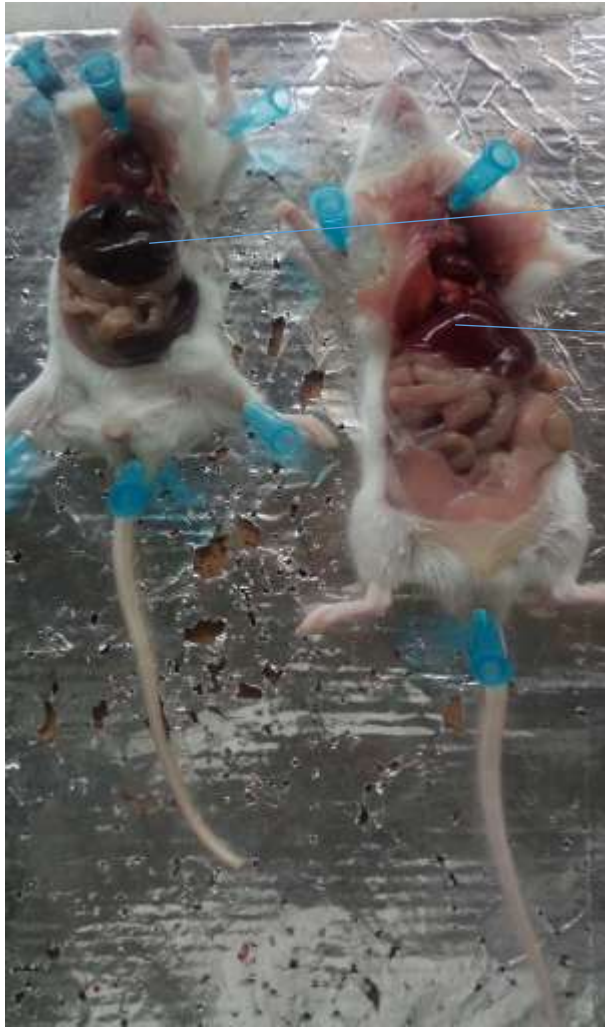

→ Liver infected with *P. berghei* ANKA

→ Normal liver
